# Supplementary material
Source: Springer Nature journal article supplement (https://www.springerprofessional.de/resource/supplementary/13638_2011_314_MOESM20_ESM.pdf/11897560)

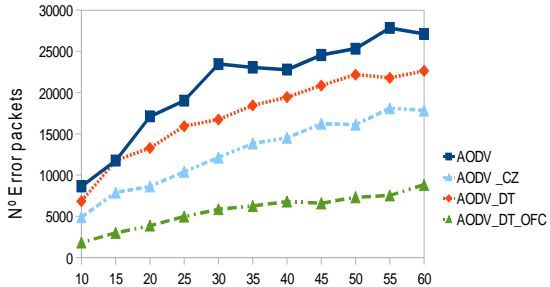

N<sup>o</sup> Connections  
(a)

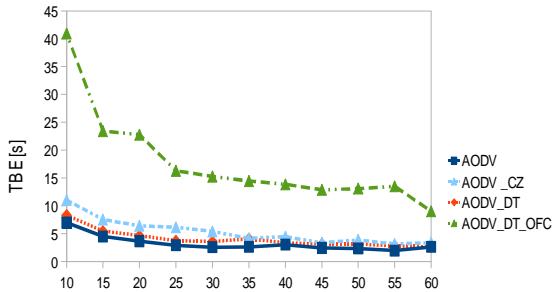

N<sup>o</sup> Connections  
(b)

Supplement: MOESM20 [file 11897560]
